# Supplementary material
Source: MDPI journal article supplement (https://www.mdpi.com/2076-3417/9/23/5169)
Supplement: s1 [file s1]

Supplementary

Analysis of Protein–Receptor Interactions on an Example of Leptin–Leptin Receptor Interaction Using the Resonant Recognition Model

Resonant Recognition Model

Here, we present our own nonconventional, biophysical, and theoretical Resonant Recognition Model (RRM), which is based on the findings that certain periodicities within the distribution of energy of delocalized electrons along protein molecules are critical for protein biological functions and/or interactions with their targets [1–12]. The RRM model has been extensively published and experimentally successfully tested [1–28]. The RRM model has been presented and well-explained in our previous publications as follows below.

All proteins can be considered as a linear sequence of their constitutive elements, i.e., amino acids and biological function of proteins is determined primarily by this linear sequence. The RRM [1–3] interprets this linear information by transforming protein sequences into a numerical series and then into the frequency domain using digital signal processing method: fast Fourier transform (FFT).

Protein primary structure can be presented as a numerical series by assigning the relevant physical parameter value to each amino acid. Our investigations have shown that the best correlation can be achieved with parameters, which are related to the energy of delocalized electrons of each amino acid (calculated as electron–ion interaction potential (EIIP)), as electrons delocalized from the particular amino acid have the strongest impact on the electronic distribution of the whole protein [1–4]. The resulting numerical series represents the distribution of the free electron’s energies along the protein molecule.

Such numerical series are then analyzed by digital signal analysis methods, using FFT, to extract information pertinent to the biological function. As the distance between amino acid residues in a polypeptide chain (protein backbone) is 3.8 Å, it can be assumed that the points in the numerical sequence are equidistant. For further numerical analysis, the distance between points in these numerical sequences is set at an arbitrary value of d = 1. Therefore, the maximum frequency in the spectrum is F = 1/2 and d = 0.5. The total number of points in the sequence influences the resolution of the spectrum only. Thus, for N-point sequence, the resolution in the spectrum is equal to 1/N. The n-th point in the spectral function corresponds to the frequency f = n/N.

To extract common spectral characteristics of sequences having the same or similar biological function, the multiple cross-spectral function is used. Peak frequencies in such a multiple cross-spectral function present common frequency components for all sequences analyzed. Such common frequency components are found to be related to the common biological function of the analyzed proteins leading to the conclusion that each specific biological function within the protein is characterized by one frequency [1–3,5–6].

Each biological function and/or process is driven by proteins that selectively interact with other proteins, DNA regulatory segments, or small molecules. Using the RRM method, it has been shown that proteins and their targets share the same matching characteristic frequency (periodicity) [1–3,5–6]. The matching of periodicities within the distribution of energies of free electrons along the interacting proteins can be regarded as the resonant recognition and is highly selective. Thus, the RRM frequencies characterize not only protein function but also recognition and interaction between a protein and its targets: receptors, binding proteins, and inhibitors. In addition, it has also been shown that interacting proteins have opposite phases at their characteristic recognition frequency [1–3,5,7]. Every frequency can be presented by one sinusoid characterized with its frequency, amplitude, and phase. The phase is presented in radians and can be between –π and +π (−3.14 and +3.14). The phase difference of or about 3.14 is considered opposite phase. The phase value can be presented in the phase circle where it is easier to observe graphically opposite phases.

It has been proposed that the RRM frequencies characterize not only a general function but also a recognition and interaction between the macromolecule and its target, which then can be considered as resonant recognition. This could be achieved with resonant energy transfer between the interacting macromolecules through oscillations of a physical field, which is electromagnetic in nature. Since there is evidence that proteins have certain conducting or semi-conducting properties, a charge moving through the macromolecular backbone and passing different energy stages, caused by different amino acid or nucleotide side groups, can produce sufficient conditions for a specific electromagnetic radiation or absorption. The frequency ranges of this field depend on the charge velocity. The RRM proposes, based on solid state physics principles, that the charge is travelling through the macromolecular backbone at the estimated velocity of 7.87 x 105 m/s [8,9]. For this velocity and with the distance between amino acids in a protein backbone of 3.8 Å, the frequency of protein interactions was estimated to be in the range between 1013 Hz and 1015 Hz. Therefore, the estimated frequency range for both amino acid and nucleotide macromolecules includes far infra-red, infra-red, visible, and ultra-violet light. To support this idea, we compared our RRM computational predictions for variety of biological functions with a number of published experimental results [1–3]:

- Laser light growth promotion of cells by using the frequencies of light to produce the similar effect to that of growth factor proteins;
- Chymotrypsin activation (increase of enzyme activity) achieved by laser light radiation in a range of 850–860 nm;
- Activation of highly homologous plant photoreceptors which, although being very homologous, absorb different wavelengths of light;
- Photo activated proteins, e.g., rhodopsin, flavodoxin, etc.

These comparisons have empirically shown a strong linear correlation between frequencies, as calculated using the RRM method and experimentally measured characteristic frequencies, with the slope factor of K = 201 [1–3,10]. This finding is parallel with the frequency range previously associated with the RRM numerical frequency spectrum that has been calculated from the charge velocities through the protein backbone. This correlation can be represented as the following:

λ = K / frrm

where λ is the wavelength of light irradiation in nm, which can influence particular biological process, frrm is RRM numerical frequency, and K is coefficient of this linear correlation.

We applied this concept on a number of proteins and DNA examples [4–15]. The concept has also been experimentally tested by predicting the electromagnetic frequencies for activation of l-lactate dehydrogenase [12]. In this experiment, by radiating l-lactate dehydrogenase with RRM predicted calculated electromagnetic frequencies and a significant change in enzyme activity was achieved. The concept has also been tested independently on experimental measurements of photon emission from dying melanoma cells [13], on photon emission from lethal and non-lethal Ebola strains [14], as well as on classic signaling pathway, JAK-STAT, traditionally composed of nine sequential protein interactions [15]. Even more, the RRM model, for the first time, explains how and why external blue light can be used in the treatment of Crigler–Najjar syndrome [11].

Keeping all this in mind, we propose that the RRM concept is an excellent predictor for proteins selective interactions, biological processes, and pathways in living cells. In our previous work, we have calculated a large number of specific frequencies for different protein and DNA biological functions and interactions [1–12,16–23].

Bioactive peptide design

Once the characteristic biological function of the protein is identified, it is possible to design new proteins with desired frequency components and consequently with desired biological functions [1–3,7,17–23]. The process of bioactive peptides design is as follows:

- Determination of RRM characteristic frequency using multiple cross-spectral function for a group of protein sequences that share common biological function (interaction);
- Determination of phases for the characteristic frequencies of a particular protein. which is selected as the parent for agonist/antagonist peptide;
- Calculation using inverse Fourier transform of the signal with characteristic frequency and phase. The minimal length of the designed peptide is defined by the characteristic frequency f as 1/f;
- Determination of resulting amino acid sequence using tabulated EIIP parameter values.

This approach has already been successfully applied and experimentally tested in the design of FGF [1–3,18], HIV envelope protein analogue [1–3,7,19–20], mice IL-12 analogue [16,21], and peptide to mimic Myxoma virus oncolytic function [22–23].

It is interesting to note that de novo designed peptides do not have any significant homology with the original protein; but, when their 3D structure is predicted, it has been shown that this 3D structure is very similar to the 3D structure of the original protein active site [18]. As 3D structure is defined by protein primary structure, it seems that RRM by analyzing frequencies within primary structure can decipher rules for how 3D structure is formed.

Prediction of the key amino acids – “hot spots”

Knowing the characteristic frequency of particular protein function creates the possibility to predict which amino acids prevail in the sequence and predominantly contribute to this frequency and consequently to the observed function. This could be achieved by small alternations of amplitude in single protein spectrum at characteristic frequency and then observing which amino acids are mostly sensitive to this alternation [1–3,24–28]. These sensitive amino acids ("hot spots") are related to characteristic frequency and consequently to the corresponding biological function. The “hot spots” predictions, using the RRM, have been applied already to a number of protein and DNA examples including: interleukin-2, SV40 enhancer, epidermal growth factor EGF, Ha-ras p21 oncogene product, glucagons, hemoglobins, myoglobins, and lysozymes [1–3,24–28]. It has been experimentally documented at the example of influenza virus that such predicted amino acids denote residues crucial for protein function [28].

In addition, these “hot spots” amino acids, although not sequentially linked, are found to be spatially clustered in the protein tertiary structure and to be positioned in and around the protein active site [24–28]. This could mean that protein 3D structure is formed as resonant box for the characteristic frequency.

**References**

1. Cosic,I.MacromolecularBioactivity:IsitResonantInteractionbetweenMacromolecules?-TheoryandApplications. *IEEE Trans Biomed. Eng.* **1994**, *41*,1101–1114.
2. Cosic,I.Virtualspectroscopyforfunandprofit. *Biotechnology* **1995**, *13*,236–238.
3. Cosic,I. *The Resonant Recognition Model of Macromolecular Bioactivity: Theory and Applications*;BirkhauserVerlag: Basel,Switzerland, 1997.
4. Pirogova,E.;Cosic,I.ExaminationofaminoacidindexeswithintheResonantRecognitionModel.In Proceedings of the 2nd Conference of the IEEE EMBS,Melbourne, Australia, 20 February 2001; pp.124–127.
5. Cosic,I.;Cosic,D.;Lazar,K.AnalysisofTumorNecrosisFactorFunctionUsingtheResonantRecognitionModel. *Cell Biochem. Biophys.* **2015**, *11*,doi:10.1007/s12013-015-0716-3.
6. Cosic,I.;Lazar,K.;Cosic,D.CellularAgeing—Telomere,TelomeraseandProgerinanalysedusingResonantRecognitionModel. *Med. Data* **2014**, *6*,205–209.
7. Krsmanovic,V.;Biquard,J.M.;Sikorska-Walker,M.;Cosic,I.;Desgranges,C.;Trabaud,M.A.;Whitfield,J.F.;Durkin,J.P.;Achour,A.;Hearn,M.T.InvestigationintotheCross-reactivityofRabbitAntibodiesRaisedagainstNonhomologousPairsofSyntheticPeptidesDerivedfromHIV-1gp120proteins. *J. Pept. Res.* **1998**, *52*,410–412.
8. Cosic,I.;Lazar,K.;Cosic,D.PredictionofTubulinresonantfrequenciesusingtheResonantRecognitionModel(RRM). *IEEE Trans. Nanobioscience* **2015**, *12*,491–496,doi:10.1109/TNB.2014.2365851.
9. Cosic,I.;Cosic,D.;Lazar,K.Isitpossibletopredictelectromagneticresonancesinproteins,DNAandRNA? *Nonlinear Biomed. Phys.* **2015**, *3*,doi:10.1140/s40366-015-0020-6.
10. Cosic,I.;Cosic,D.;Lazar,K.EnvironmentalLightandItsRelationshipwithElectromagneticResonancesofBiomolecularInteractions,asPredictedbytheResonantRecognitionModel. *Int. J. Environ. Res. Public Health* **2016**, *13*,647,doi:10.3390/ijeprh13070647.
11. Cosic,I.;Cosic,D.TheTreatmentofCrigler-NajjarSyndromebyBlueLightasExplainedbyResonantRecognitionModel. *EPJ Nonlinear Biomed. Phys.* **2016**, *4*,doi:10.1140/epjnbp/s40366-016-0036-6.
12. Vojisavljevic,V.;Pirogova,E.;Cosic,I.TheEffectofElectromagneticRadiation(550nm-850nm)onI-LactateDehydrogenaseKinetics. *Int. J. Radiat. Biol.* **2007**, *83*,221–230.
13. Dotta,B.T.;Murugan,N.J.;Karbowski,L.M.;Lafrenie,R.M.;Persinger,M.A.Shiftingwavelengthofultraweakphotonemissionsfromdyingmelanomacells:TheirchemicalenhancementandblockingarepredictedbyCosic’stheoryofresonantrecognitionmodelformacromolecules. *Naturwissenschaften* **2014**, *101*,doi:10.1007/s00114-013-1133-3.
14. Murugan,N.J.;Karbowski,L.M.;Persinger,M.A.Cosic’sResonanceRecognitionModelforProteinSequencesandPhotonEmissionDifferentiatesLethalandNon-LethalEbolaStrains:ImplicationsforTreatment. *Open J. Biophys.* **2014**, *5*,35.
15. Karbowski,L.M.;Murugan,N.J.;Persinger,M.A.NovelCosicresonance(standingwave)solutionsforcomponentsoftheJAK-STATcellularsignallingpathway:Aconvergenceofspectraldensityprofiles. *FEBS Open Bio* **2015**, *5*,245–250.
16. Pirogova,E.;Istivan,T.;Gan,E.;Cosic,I. *Advances in Methods for Therapeutic Peptide Discovery, Design and Development, Current Pharmaceutical Biotechnology*;BenthamSciencePublishersLtd.: Soest,The Netherlands,2011; Volume12,1117–1127.
17. Cosic,I.;Pirogova,E.BioactivePeptideDesignusingtheResonantRecognitionModel.Nonlinear *Biomed. Phys.* **2007**, *1*,doi:10.1186/1753-4631-1-7.
18. Cosic,I.;Drummond,A.E.;Underwood,J.R.;Hearn,M.T.W.InvitroinhibitionoftheactionsofbasicFGFbynovel16aminoacidpeptides. *Mol. Cell. Biochem.* **1994**, *130*,1–9.
19. Hearn,M.T.W.;Biquard,J.M.;Cosic,I.;Krsmanovic,V.PeptidesImmunologicallyrelatedtoproteinsexpressedbyaviralagent,havingasequenceofaminoacidsorderedbymeansofproteininformationalmethod.USPatent6,294,174,25/09/2001.
20. Achour,A.;Biquard,J.M.;Krsmanovic,V.;M’Bika,J.P.;Ficheux,D.;Sikorska,M.;Cozzone,A.J.InductionofHumanImmunodeficiencyVirus(HIV-1)EnvelopeSpecificCell-MediatedImmunitybyaNon-HomologusSyntheticPeptide. *PLoS ONE* **2007**, *11*,1–12,doi:10.1371/journal.pone.0001214.
21. Pirogova,E.;Istivan,T.;Gan,E.;Coloe P;Cosic,I. *Computationally Designed Interleukin-like Peptide as a Candidate for Cnacer Treatment*. *IFMBE Proceedings 25/IV.* **2009**,1973-1976.
22. Almansour,N.;Pirogova,E.;Coloe,P.;Cosic,I.;Istivan,T.Investigationofcytotoxicityofnegativecontrolpeptidesversusbioactivepeptidesonskincancerandnormalcells:Acomparativestudy. *Future Med. Chem.* **2012**, *4*,1553–1565.
23. Istivan,T.;Pirogova,E.;Gan,E.;Almansour,N.;Coloe,P.;Cosic,I.BiologicaleffectsofaDeNovodesignedmyxomaviruspeptideanalogue:Evaluationofcytotoxicityontumorcells. *PLoS ONE* **2011**, *6*,1–10.
24. Cosic,I.;Hearn,M.T.W."HotSpot"AminoAcidDistributioninHa-rasOncogeneProductp21:RelationshiptoGuanineBindingSite. *J. Mol. Recognit.* **1991**, *4*,57–62.
25. Cosic,I.;Hearn,M.T.W.StudiesonProtein-DNAInteractionsUsingtheResonantRecognitionModel:ApplicationtoRepressorsandTransformingProteins. *Eur. J. Biochem* **1992**, *205*,613–619.
26. Cosic,I.;Hodder,A.N.;Aguilar,M.I.;Hearn,M.T.W.ResonantRecognitionModelandproteintopography:Modelstudieswithmyoglobin,haemoglobinandlysozyme. *Eur. J. Biochem.* **1991**, *198*,113–119.
27. Caceres,J.L.H.;Cosic,I.;Cosic,D.ApplicationofTheResonantRecognitionModeltoTheStudyofPlasmodiumProteinsInvolvedinMalariaInfection. *Med. Data* **2015**, *7*,007–014.
28. Schmier, S.; Mostafa, A.; Haarmann, T.; Bannert, N.; Ziebuhr, J.; Veljkovic, V.; Dietrich, U.; Pleschka, S. In silico prediction and experimental confirmation of HA residues conferring enhanced human receptor specificity of H5N1 influenza A viruses. *Sci. Rep.* **2015**, *5*, doi:10.1038/srep11434.

| 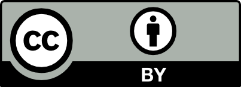 | © 2019 by the authors. Submitted for possible open access publication under the terms and conditions of the Creative Commons Attribution (CC BY) license (http://creativecommons.org/licenses/by/4.0/). |
| --- | --- |
